# Supplementary material for: Digital Flashcards and the MCAT: Insights from Current Medical Students on Essential Study Resources
Source: Research Square preprint supplement (doi:10.21203/rs.3.rs-6615175/v1), 2025-06-06
Supplement: Supplementary file 1 [file 2a0a35a2e484ad662bf53c24.pdf]

## Background Information

What year of medical school are you currently in?

- ☐ M1 - Class of 2028
- ☐ M2 - Class of 2027
- ☐ M3 - Class of 2026

Were you a member of Saint Louis University's Medical Scholars Program as an undergraduate student?

- ☐ Yes
- ☐ No

What is your age?

Did you take any gap years after finishing your undergraduate degree?

- ☐ Yes
- ☐ No

What was your ACT score? If not applicable, select "N/A."

- ☐ 31-36
- ☐ 25-30
- ☐ 19-24
- ☐ 13-18
- ☐ N/A

What was your SAT score? If not applicable, select "N/A."

- ☐ 1400-1600
- ☐ 1250-1399
- ☐ 1050-1199
- ☐ 800-1049
- ☐ N/A

Did you mark yourself as "Disadvantaged" on your AMCAS application?

- ☐ Yes
- ☐ No

Did you apply for the AAMC's Fee Assistance Program (FAP)?

- ☐ Yes
- ☐ No

### MCAT Background

Have you taken the MCAT more than once?

- ☐ Yes
- ☐ No

What was your highest composite MCAT score?

What was the "Chemical and Physical Foundations" subsection score on your highest MCAT?

What was the "Critical Analysis and Reading Skills" subsection score on your highest MCAT?

What was the "Biological and Biochemical Foundations" subsection score on your highest MCAT?

What was the "Psychological, Social, and Biological Foundations" subsection score on your highest MCAT?

How many months did you spend studying for the MCAT?

## Resources

Which study tools did you use to prepare for the MCAT? Choose all that apply.

- ☐ Anki
- ☐ Quizlet
- ☐ Paper flashcards
- ☐ AAMC Full Length Exams
- ☐ AAMC Section Bank
- ☐ AAMC Question Packs
- ☐ Blueprint Full Length Exams
- ☐ Kaplan Full Length Exams
- ☐ The Princeton Review Full Length Exams
- ☐ Altius Full Length Exams
- ☐ UWorld

- ☐ Kaplan MCAT Review Books
- ☐ The Princeton Review MCAT Review Books
- ☐ Kaplan MCAT Prep Course
- ☐ The Princeton Review MCAT Prep Course
- ☐ Other

## Anki

Was Anki a tool you've used prior to studying for the MCAT?

- ☐ Yes
- ☐ No

Which subjects on the MCAT did you use Anki to study for? Choose all that apply.

- ☐ Chemical and Physical Foundations
- ☐ Critical Analysis and Reading Skills
- ☐ Biological and Biochemical Foundations
- ☐ Psychological, Social, and Biological Foundations

How often would you say you used Anki per week while studying for the MCAT, on average?

- ☐ Approximately 7 days per week
- ☐ Approximately 5-6 days per week
- ☐ Approximately 3-4 days per week
- ☐ Approximately 1-2 days per week

On the days when you used Anki, approximately how many hours did you spend doing Anki per day?

Rate how much you agree with the following statement: Anki helped me retain information throughout my course of studying for the MCAT.

- ☐ Strongly agree
- ☐ Somewhat agree
- ☐ Neither agree nor disagree
- ☐ Somewhat disagree
- ☐ Strongly disagree

Rate how much you agree with the following statement: Anki contributed to my understanding of content for the MCAT.

- ☐ Strongly agree
- ☐ Somewhat agree
- ☐ Neither agree nor disagree
- ☐ Somewhat disagree
- ☐ Strongly disagree

Rate how much you agree with the following statement: I would recommend Anki to other students studying for the MCAT.

- ☐ Strongly agree
- ☐ Somewhat agree
- ☐ Neither agree nor disagree
- ☐ Somewhat disagree
- ☐ Strongly disagree

Rate how much you agree with the following statement: I plan to use Anki in medical school.

- ☐ Strongly agree
- ☐ Somewhat agree
- ☐ Neither agree nor disagree
- ☐ Somewhat disagree

☐ Strongly disagree

## Resources

How many AAMC Full Length exams did you take?

How many Blueprint Full Length exams did you take?

How many Altius Full Length exams did you take?

How many Kaplan Full Length exams did you take?

How many The Princeton Review Full Length exams did you take?

Approximately how much of UWorld did you complete?

- ☐ 75-100%
- ☐ 50-74%
- ☐ 25-49%
- ☐ 0-24%

Approximately how much of the AAMC Section Bank did you complete?

- ☐ 75-100%
- ☐ 50-74%

- ☐ 25-49%
- ☐ 0-24%

Approximately how much of the AAMC Question Packs did you complete?

- ☐ 75-100%
- ☐ 50-74%
- ☐ 25-49%
- ☐ 0-24%

### **Resources: Quality Assessment**

How much would you say Anki helped you with achieving your MCAT score?

- ☐ Not helpful
- ☐ Somewhat helpful
- ☐ Very helpful

How much would you say Quizlet helped you with achieving your MCAT score?

- ☐ Not helpful
- ☐ Somewhat helpful
- ☐ Very helpful

How much would you say paper flashcards helped you with achieving your MCAT score?

- ☐ Not helpful
- ☐ Somewhat helpful
- ☐ Very helpful

How much would you say AAMC Full Length exams helped you with achieving your MCAT score?

- ☐ Not helpful

- ☐ Somewhat helpful
- ☐ Very helpful

How much would you say the AAMC Section Bank helped you with achieving your MCAT score?

- ☐ Not helpful
- ☐ Somewhat helpful
- ☐ Very helpful

How much would you say the AAMC Question Packs helped you with achieving your MCAT score?

- ☐ Not helpful
- ☐ Somewhat helpful
- ☐ Very helpful

How much would you say Blueprint Full Length exams helped you with achieving your MCAT score?

- ☐ Not helpful
- ☐ Somewhat helpful
- ☐ Very helpful

How much would you say Kaplan Full Length exams helped you with achieving your MCAT score?

- ☐ Not helpful
- ☐ Somewhat helpful
- ☐ Very helpful

How much would you say The Princeton Review Full Length exams helped you with achieving your MCAT score?

- ☐ Not helpful



- ☐ Somewhat helpful
- ☐ Very helpful

How much would you say Altius Full Length Full Length exams helped you with achieving your MCAT score?

- ☐ Not helpful
- ☐ Somewhat helpful
- ☐ Very helpful

How much would you say UWorld helped you with achieving your MCAT score?

- ☐ Not helpful
- ☐ Somewhat helpful
- ☐ Very helpful

How much would you say the Kaplan MCAT review books helped you with achieving your MCAT score?

- ☐ Not helpful
- ☐ Somewhat helpful
- ☐ Very helpful

How much would you say The Princeton Review MCAT review books helped you with achieving your MCAT score?

- ☐ Not helpful
- ☐ Somewhat helpful
- ☐ Very helpful

How much would you say the Kaplan MCAT prep course helped you with achieving your MCAT score?

- ☐ Not helpful
- ☐ Somewhat helpful

☐ Very helpful

How much would you say The Princeton Review MCAT prep course helped you with achieving your MCAT score?

☐ Not helpful

☐ Somewhat helpful

☐ Very helpful

**Resources: If they would recommend them**

Would you recommend Anki to future pre-medical students studying for the MCAT?

☐ Yes

☐ No

Would you recommend Quizlet to future pre-medical students studying for the MCAT?

☐ Yes

☐ No

Would you recommend paper flashcards to future pre-medical students studying for the MCAT?

☐ Yes

☐ No

Would you recommend AAMC Full Length Exams to future pre-medical students studying for the MCAT?

☐ Yes

☐ No

Would you recommend the AAMC Section Bank to future pre-medical students studying for the MCAT?

- ☐ Yes
- ☐ No

Would you recommend AAMC Question Packs to future pre-medical students studying for the MCAT?

- ☐ Yes
- ☐ No

Would you recommend Blueprint Full Length exams to future pre-medical students studying for the MCAT?

- ☐ Yes
- ☐ No

Would you recommend Kaplan Full Length exams to future pre-medical students studying for the MCAT?

- ☐ Yes
- ☐ No

Would you recommend The Princeton Review Full Length exams to future pre-medical students studying for the MCAT?

- ☐ Yes
- ☐ No

Would you recommend Altius Full Length exams to future pre-medical students studying for the MCAT?

- ☐ Yes
- ☐ No

Would you recommend UWorld to future pre-medical students studying for the MCAT?

- ☐ Yes
- ☐ No

Would you recommend the Kaplan MCAT review books to future pre-medical students studying for the MCAT?

- ☐ Yes
- ☐ No

Would you recommend The Princeton Review MCAT review books to future pre-medical students studying for the MCAT?

- ☐ Yes
- ☐ No

Would you recommend the Kaplan MCAT prep course to future pre-medical students studying for the MCAT?

- ☐ Yes
- ☐ No

Would you recommend The Princeton Review MCAT prep course to future pre-medical students studying for the MCAT?

- ☐ Yes
- ☐ No

Rate how much you agree with the following statement: If I had to take the MCAT exam again, I would study using the same resources.

- ☐ Strongly agree
- ☐ Somewhat agree

- ☐ Neither agree nor disagree
- ☐ Somewhat disagree
- ☐ Strongly disagree

Powered by Qualtrics
